# Supplementary material for: Nuclear RNA-seq of single neurons reveals molecular signatures of activation
Source: PubMed Central journal article supplement (PMC4838832; doi:10.1038/ncomms11022), 2016-04-19
Supplement: ncomms11022-s1.pdf [file ncomms11022-s1.pdf]

1 SUPPLEMENTARY DATA

2

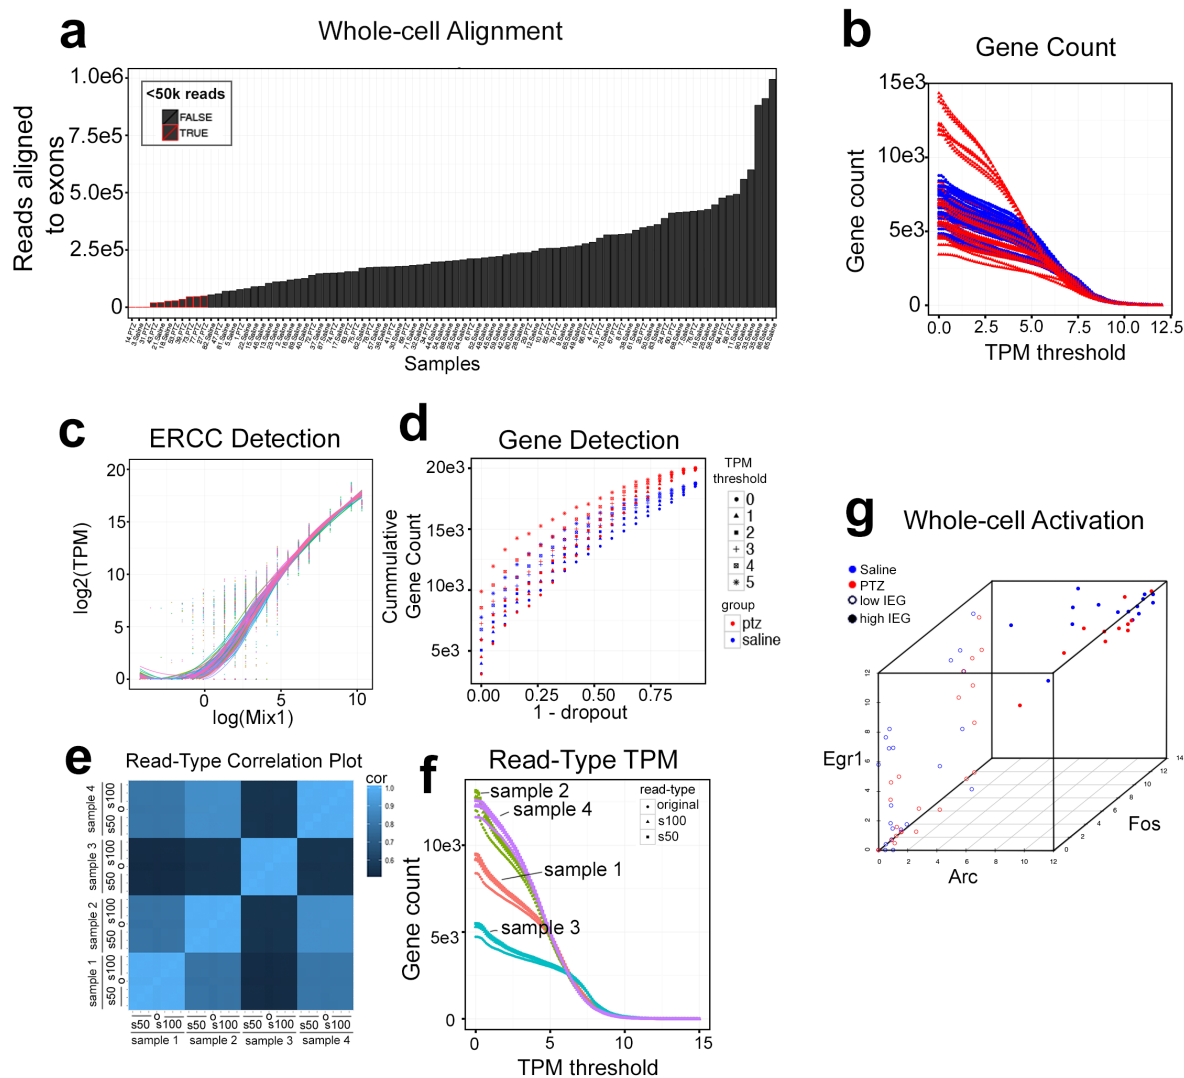

3

4 Supplementary Figure 1. Whole-cell RNA-seq quality measures

5 a) Number of aligned reads for each whole-cell sample. Samples excluded from further analysis are

6 colored in red. b) Gene count as a function of TPM threshold. Red= PTZ-treated whole-cells, blue=

7 saline-treated whole-cells. Each line represents an individual sample. c) Detection of spiked-in ERCC

8 molecules against the original concentration of Mix1. Each line is a smoothed function over each

9 sample. d) Gene count as a function of the total number of samples with detectable expression of a given

10 gene (1 – dropout). Detectable expression was defined as  $TPM > x$  where  $x$  is denoted by separate  
11 shapes. e and f) The effect of read-type on expression measured by correlation (e) and gene count (f).  
12 Four PTZ-treated samples were chosen that had high, middle, and low gene counts. Single-end fastq  
13 libraries were simulated for each sample by randomly sampling the original paired-end dataset (o). Six  
14 random simulations were performed for each group, three single-end x 100bp (s100) and three single-  
15 end x 50bp (s50). Pearson correlation coefficients between the RSEM aligned  $\log_2(TPM)$  values are  
16 plotted in e and the gene counts as a function of TPM threshold are plotted in f. g) Expression of IEGs,  
17 *Arc*, *Fos*, and *Egr1* in saline- and PTZ-treated whole-cells. The samples represented by solid dots were  
18 analyzed for differences in the activated transcriptome between saline- and PTZ-treated cells.

19

20

21

22

23

24

25

26

27

28

29

30

31

32

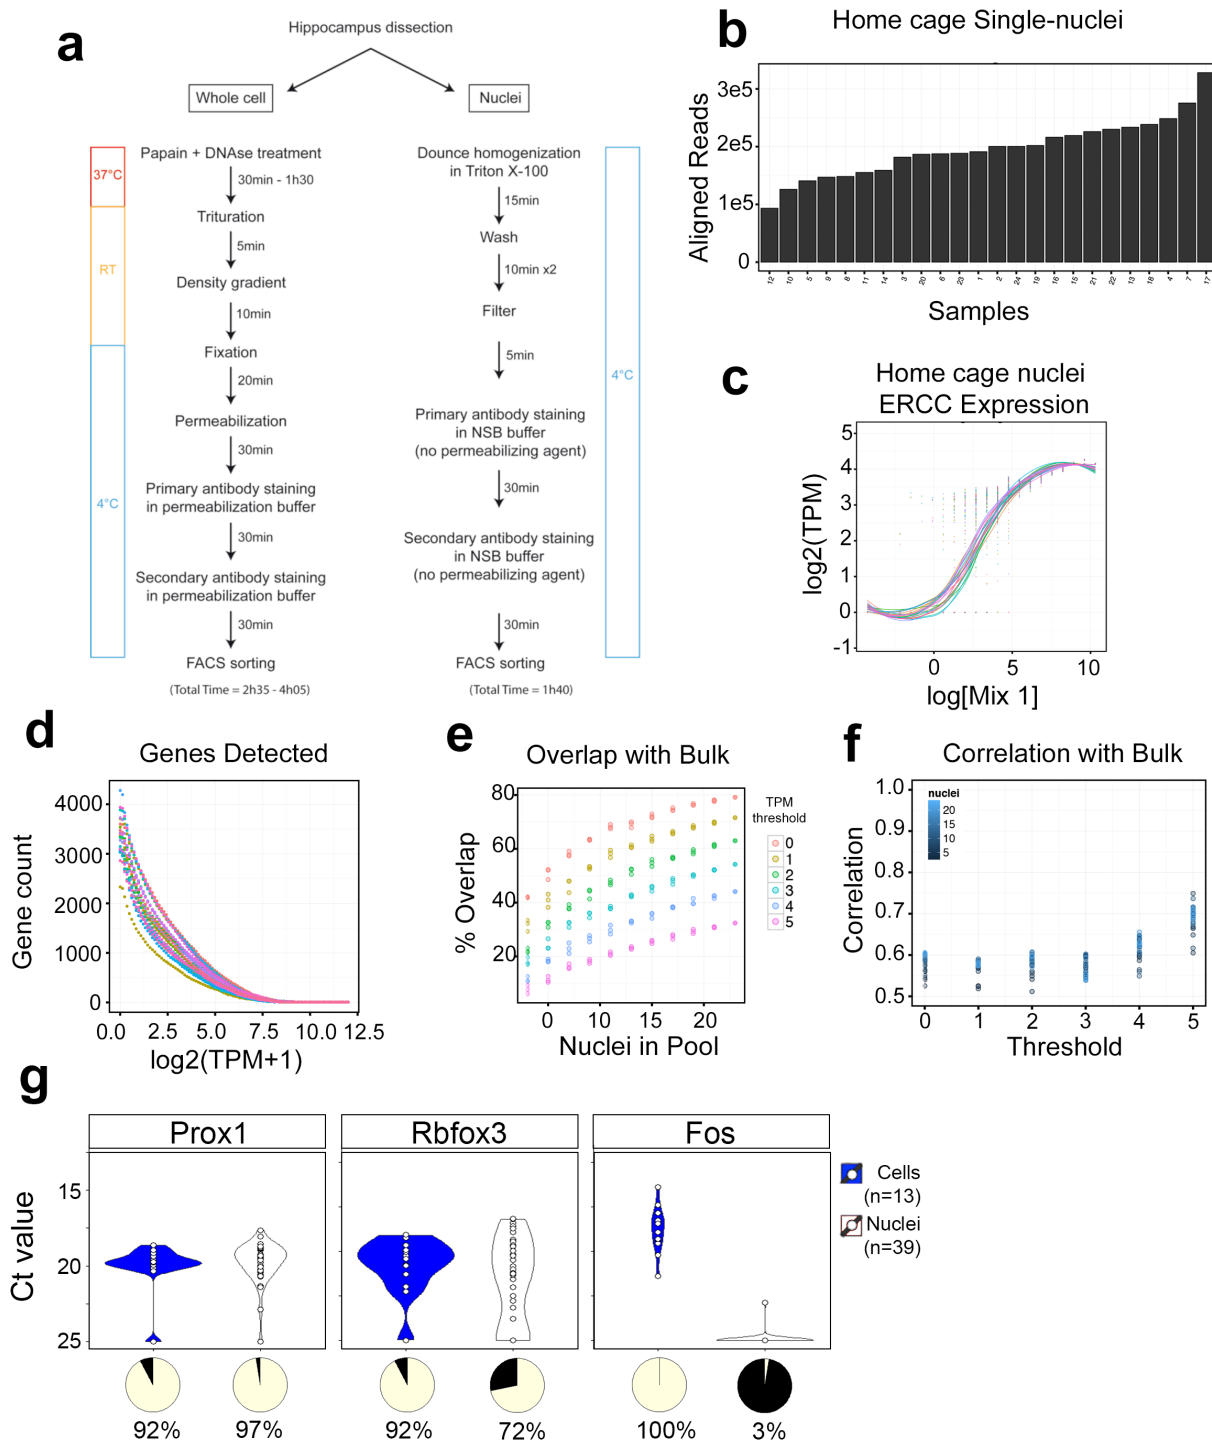

33

34 Supplementary Figure 2. Home cage single-nuclei RNA-seq quality measures

35 a) Comparison of whole cell and nuclei dissociation protocols following mouse hippocampus dissection.

36 (Left) To dissociate whole cells, minced hippocampus was incubated in a papain solution (20 units/ml

37 papain, 0.005% DNase) at 37°C for 30 min-1.5h with gentle agitation, followed by gentle trituration.  
38 Dissociated cells were pelleted and resuspended in ovomucoid inhibitor-albumin medium at room  
39 temperature (RT). Centrifugation of a single step discontinuous density gradient at RT separated intact  
40 whole cells. The pellet containing the intact cells was resuspended in PBS and subsequently fixed with  
41 paraformaldehyde (Nuclear Factor Fixation buffer, Biolegend) for 20 min at 4°C. Cells were then  
42 permeabilized in Nuclear Factor Permeabilization Buffer (Biolegend) for 30 min, then intranuclear  
43 stained with primary and secondary antibodies performed in Nuclear Factor Permeabilization Buffer  
44 prior to FACS sorting. (Right) For single nuclei dissociation, dissected hippocampus was immediately  
45 placed into a nuclei isolation medium (sucrose 0.25 M, KCl 25 mM, MgCl<sub>2</sub> 5 mM, TrisCl 10 mM,  
46 dithiothreitol, 0.1 % Triton). Tissue was Dounce homogenized, allowing for mechanical separation of  
47 nuclei from cells. The nucleic acid stain Hoechst 33342 (5 μM, Life Technologies) was included in the  
48 media to facilitate nuclei visualization. Samples were washed, resuspended in nuclei storage buffer  
49 (NSB buffer: sucrose, MgCl<sub>2</sub> 5 mM, and TrisCl 10 mM) and filtered. Primary and secondary antibody  
50 stainings were performed in NSB buffer prior to FACS sorting. Solutions and samples were kept at 4°C  
51 throughout this protocol. b) Number of aligned reads for each HC single-nuclei sample. c) Correlation  
52 between the detection of spiked-in ERCCs and their original concentration in Mix1. d) Number of genes  
53 detected in each sample as a function of TPM threshold. Each color represents a separate sample (mean  
54 2,185 +/- 377 genes). e) Percentage overlap of genes detected above a given threshold (color) in single-  
55 nuclei compared to all genes in bulk nuclei. f) Correlation of genes detected above the TPM threshold  
56 (color) in single-nuclei compared to the same genes in bulk. g) qPCR results from whole-cell (N = 13)  
57 and single-nuclei (N = 39) preparations. Pie charts indicate the number of samples with detectable  
58 expression.

59

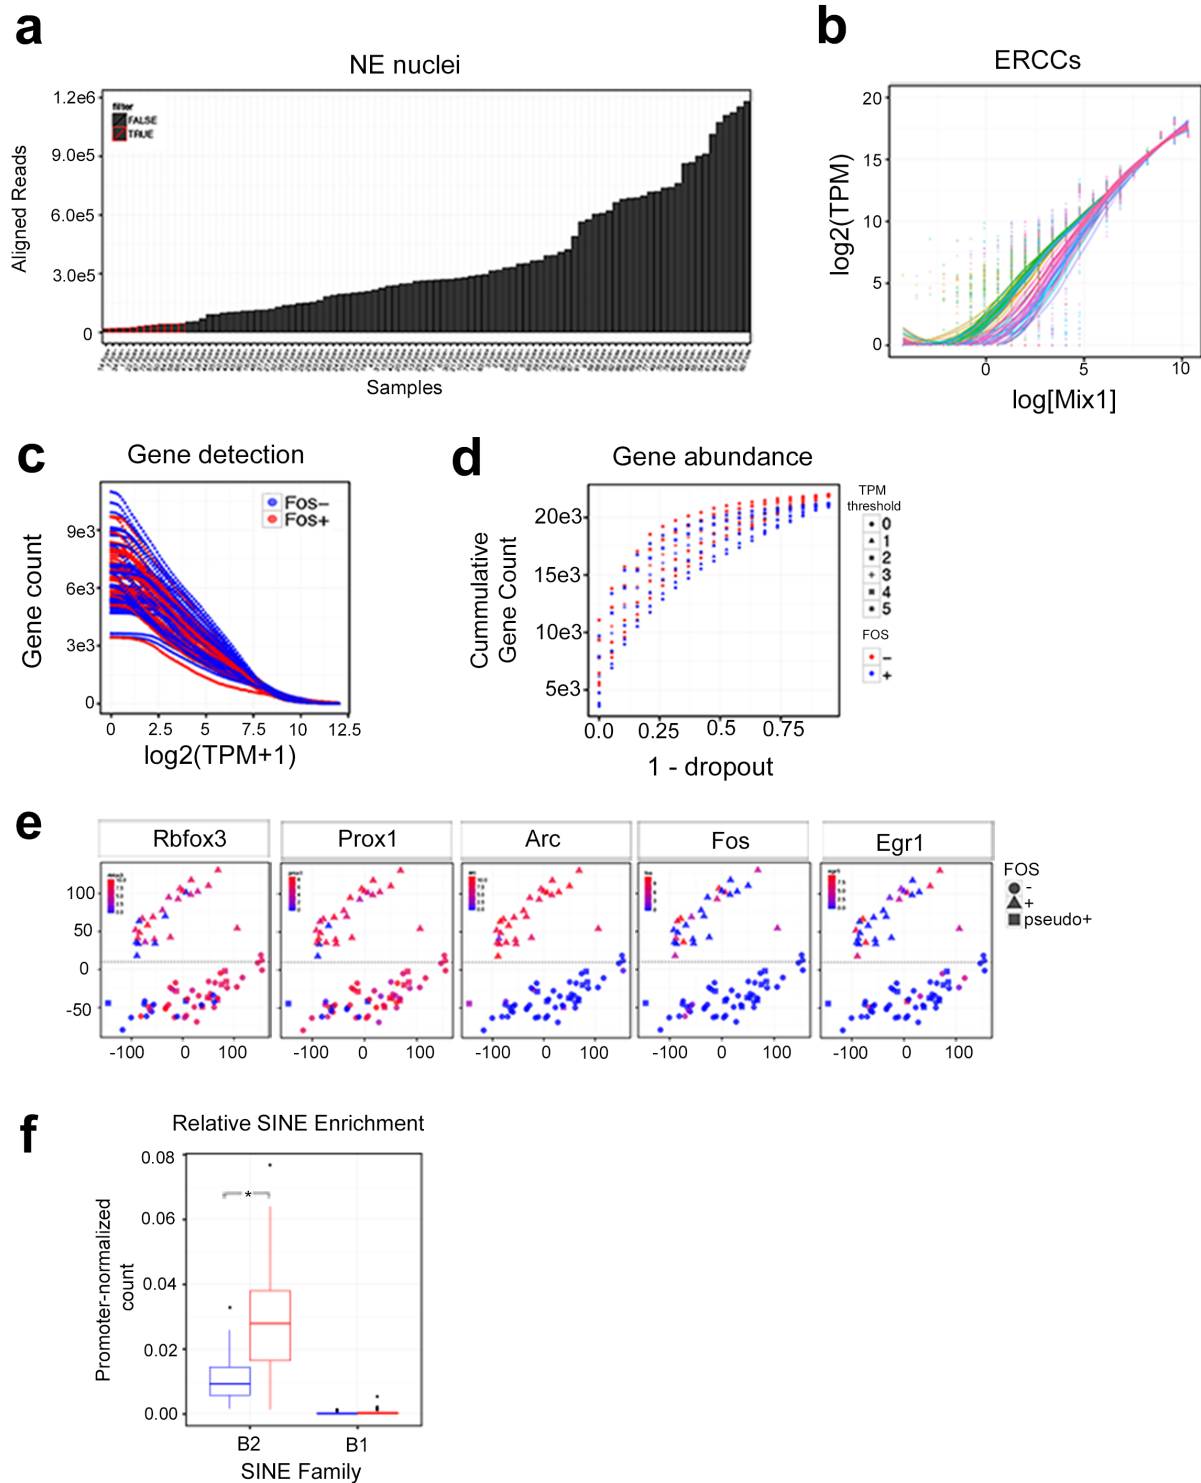

60

61 Supplementary Figure 3. Quality of NE nuclei with distinct expression patterns

62 a) Total aligned reads for each NE nuclei sample; the samples excluded from downstream analysis are

63 colored in red. b) Correlation of the detection of spiked-in ERCC molecules as a function of the

64 concentration in Mix 1. c) For each sample, the total gene count is plotted for a continuum of TPM  
65 thresholds. d) Gene count is plotted versus the number of samples expressing a given gene above the  
66 TPM threshold. e) The principal components are plotted as the x- and y-axis with samples colored based  
67 on gene expression of *Rbfox3*, *Prox1*, *Arc*, *Fos*, and *Egr1*. f) Reads classified as B2 or B1 SINE  
68 retrotransposons which had the start of transcription adjacent to the template-switch oligo were  
69 normalized by total reads classified as the given RT element (promoter-normalized count). Counts are  
70 plotted for FOS+ (red, N = 36) and FOS- nuclei (blue, N = 43). Boxplot whiskers extend to 1.5 x the  
71 distance between the first and third quartiles of the data (the box), outliers are shown as individual  
72 points. \* = Student's t-test  $p < 5.7e-07$ .

73

74

75

76

77

78

79

80

81

82

83

84

85

86

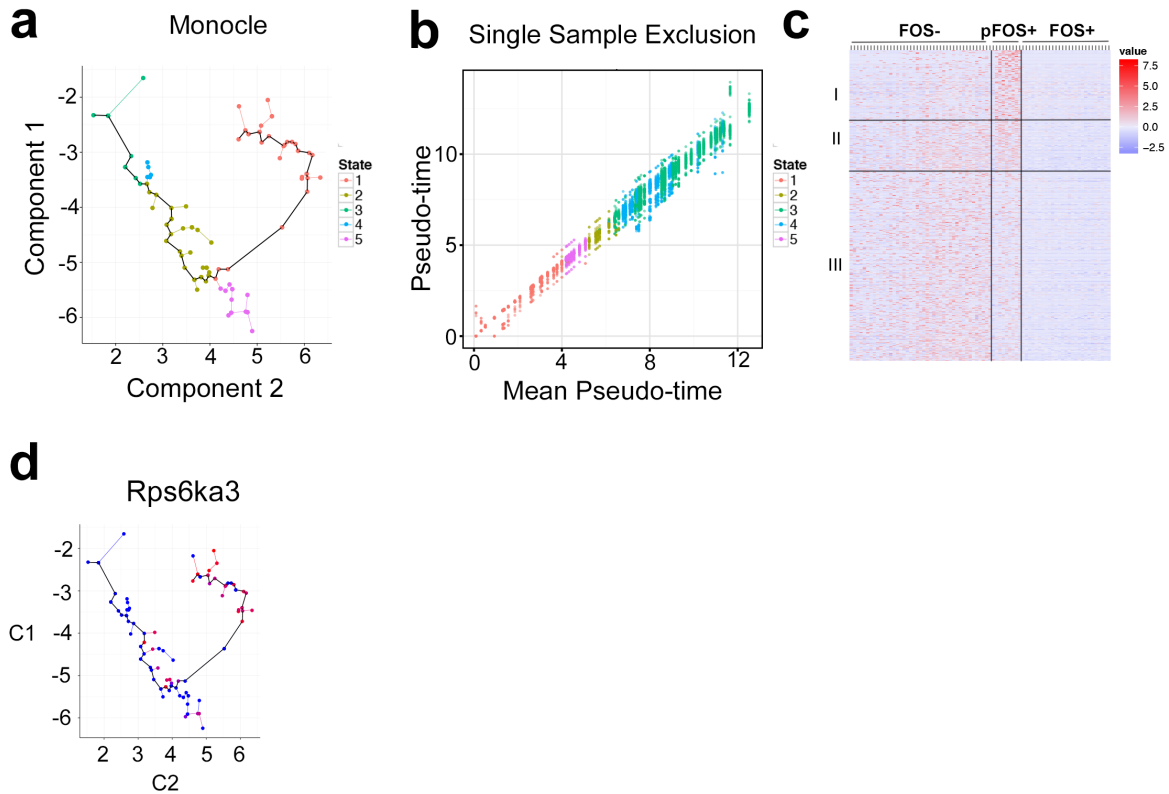

87

88 Supplementary Figure 4. Pseudotemporal ordering of NE single-nuclei

89 a) Independent components plot using the Monocle algorithm. Nuclei are colored by cluster identified  
 90 using Monocle. b) Each point represents the pseudo-time (color = cluster) calculated for a given sample  
 91 after single sample exclusion. c) Gene expression specific to pseudoFOS+ (pFOS+) nuclei, I = genes  
 92 significant only in the comparison between pseudoFOS+ and FOS+, II = genes significant in the  
 93 comparison between both pseudo-FOS+/FOS+ and FOS-/FOS+, III= genes only significant in the  
 94 comparison between FOS- and FOS+. d) *Rps6ka3* gene expression within the Monocle trajectory. Red  
 95 values = high expression, blue values = low expression.

96

97

98

99

| <b>GeneName</b> | <b>logFoldChange</b> | <b>GeneName</b> | <b>logFoldChange</b> |
|-----------------|----------------------|-----------------|----------------------|
| Atf3            | 10.788019            | Bloc1s2         | -9.570469            |
| Sertad1         | 10.21171             | Calcoco1        | -9.288679            |
| Egr4            | 9.336573             | Zfp414          | -9.17101             |
| Fos             | 9.074111             | Abhd14b         | -9.002621            |
| Myc             | 8.713386             | Tarbp2          | -8.921794            |
| Fosb            | 8.584672             | Pcgf1           | -8.911985            |
| Nr4a1           | 8.536112             | Irf3            | -8.845601            |
| Nr4a2           | 8.224405             | Capn3           | -8.806689            |
| Npas4           | 7.945442             | Cc2d1a          | -8.714088            |
| Csrnp1          | 7.863509             | Polr2g          | -8.558914            |
| Zfp516          | 7.744754             | Zfp239          | -8.414245            |
| Jdp2            | 7.198336             | Esrra           | -7.679046            |
| Plk3            | 7.114105             | Tfam            | -7.482482            |
| Nr4a3           | 6.752261             | Zfp354c         | -7.411654            |
| Egr3            | 6.154286             | Nrbf2           | -7.36774             |
| Etv3            | 5.527089             | Ice2            | -7.336292            |
| Hmga1           | 5.418522             | Brdt            | -7.067773            |
| Rbm15           | 4.464907             | Ift74           | -6.939597            |
| Sik1            | 4.28203              | Aatf            | -6.847781            |
| Rbbp7           | 3.898561             | Vps36           | -6.791745            |
| Kdm6b           | 3.701213             | Klf3            | -6.693162            |
| Med14           | 3.555778             | Hltf            | -6.511412            |
| Pak6            | 3.331462             | Lipe            | -6.484055            |
| Tet3            | 3.317724             | Zfp579          | -6.465642            |
| Cnot11          | 3.292378             | Prdm5           | -6.398878            |
| Skil            | 2.788771             | Nfatc2          | -6.368498            |
| Dot11           | 2.753235             | Otud7b          | -6.11169             |
| Fgfr1           | 2.502289             | Fer             | -6.041209            |
| Arid5a          | 2.417917             | Birc2           | -5.702661            |
| Fbxw7           | 2.203579             | Trim27          | -5.586557            |
| Ccnt2           | 2.149271             | Zfp467          | -5.583407            |
| Kdm5a           | 1.633625             | Myt1            | -5.335186            |
| Uchl5           | 1.371527             | Zbtb5           | -5.102086            |
|                 |                      | Ago1            | -4.697533            |
|                 |                      | Ercc4           | -4.664535            |
|                 |                      | Zfp553          | -4.601636            |
|                 |                      | Nos1            | -4.387089            |
|                 |                      | Csrnp3          | -4.287646            |
|                 |                      | Pbx1            | -4.286198            |



|  |  |         |           |
|--|--|---------|-----------|
|  |  | Ing5    | -4.238723 |
|  |  | Zfp2    | -4.07929  |
|  |  | Polr1e  | -3.953319 |
|  |  | Gcfc2   | -3.919166 |
|  |  | C1qbp   | -3.869258 |
|  |  | Glmp    | -3.752924 |
|  |  | Mdm2    | -3.393076 |
|  |  | Pkn1    | -3.346777 |
|  |  | Setdb1  | -3.277518 |
|  |  | Gabpb2  | -3.075843 |
|  |  | Ezh2    | -3.022416 |
|  |  | Zfp827  | -3.01394  |
|  |  | Bcl9    | -3.000494 |
|  |  | Notch1  | -2.782151 |
|  |  | Mysm1   | -2.727255 |
|  |  | Zbtb49  | -2.643727 |
|  |  | Zfp426  | -2.573105 |
|  |  | Pygo1   | -2.451065 |
|  |  | Myef2   | -2.310633 |
|  |  | Lrrfip1 | -2.253506 |
|  |  | Stat1   | -2.029698 |
|  |  | Tceanc2 | -2.019383 |
|  |  | Tox     | -1.291768 |

101

102 Supplementary Table 1. Transcription-associated differentially expressed genes

103 Genes identified as differentially expressed between FOS+ (logFoldChange > 0) and FOS-

104 (logFoldChange < 0) using EdgeR were filtered to retain genes with GO terms related to transcription.
